# Supplementary material for: Molecular characterization of gustatory second-order neurons reveals integrative mechanisms of gustatory and metabolic information
Source: eLife. 2025 Jul 9;13:RP100947. doi: 10.7554/eLife.100947 (PMC12240583; doi:10.7554/eLife.100947)
Supplement: Supplementary file 1. [file elife-100947-supp1.xlsx]

## Sheet: Sheet1
Fed Flies			Starved Flies
Replicate	#Brains dissected	#Cells collected	Replicate	#Brains dissected	#Cells collected
Gr64f_1	406	21017	Gr64f_1	372	23126
Gr64f_2	512	23782	Gr64f_2	315	23387
Gr64f_3	191	21428	Gr64f_3	459	23267
Gr66a_1	519	21260	Gr66a_1	657	27555
Gr66a_2	531	21599	Gr66a_2	718	27090
Gr66a_3	594	21433	Gr66a_3	636	26991
