# Supplementary material for: Molecular characterization of gustatory second-order neurons reveals integrative mechanisms of gustatory and metabolic information
Source: eLife. 2025 Jul 9;13:RP100947. doi: 10.7554/eLife.100947 (PMC12240583; doi:10.7554/eLife.100947)
Supplement: Supplementary file 2. [file elife-100947-supp2.xlsx]

## Sheet: Sheet1
Flywire IDs	Name
7.20576e+17
7.20576e+17
7.20576e+17
7.20576e+17
7.20576e+17
7.20576e+17
7.20576e+17
7.20576e+17
7.20576e+17
7.20576e+17
7.20576e+17
7.20576e+17
7.20576e+17
7.20576e+17	GNG.685
7.20576e+17
7.20576e+17
7.20576e+17
